# Supplementary material
Source: PubMed Central journal article supplement (PMC4208620)
Supplement: NIHMS632626-supplement-1.pdf [file NIHMS632626-supplement-1.pdf]

**Table S1. Reported allosteric modulators of family A G protein-coupled receptors**

| Receptor                                          | Modulator example(s)                                                                                                                                                                                                                                            |
|---------------------------------------------------|-----------------------------------------------------------------------------------------------------------------------------------------------------------------------------------------------------------------------------------------------------------------|
| <b>GPCR Family A</b>                              |                                                                                                                                                                                                                                                                 |
| Adenosine A <sub>1</sub>                          | (PD 81723; PD 117975; PD 78416; PD 71605; LUF 5484; T-62); <sup>1</sup><br>(VCP 520; VCP 333) <sup>2</sup>                                                                                                                                                      |
| Adenosine A <sub>2</sub>                          | Amilorides                                                                                                                                                                                                                                                      |
| Adenosine A <sub>3</sub>                          | VU5455Z; VU8504Z; DU124183; [LUF6000 (compound 3 in paper)] <sup>3</sup><br>(AM 251; 2-arachidonylglycerol or 2-AG) <sup>4</sup>                                                                                                                                |
| Adrenoceptor α <sub>1</sub>                       | Amilorides; benzodiazepines; conopeptide; p-TIA                                                                                                                                                                                                                 |
| Adrenoceptor α <sub>2A</sub> , α <sub>2B</sub>    | Amilorides (and possibly sodium ions) <sup>5</sup>                                                                                                                                                                                                              |
| Adrenoceptor β <sub>2</sub>                       | Zinc <sup>6</sup>                                                                                                                                                                                                                                               |
| Cannabinoid CB <sub>1</sub>                       | Org27569 <sup>7</sup> ; Org27759 <sup>7</sup> ; PSNCBAM-1 <sup>8</sup> ; (JHW 007, RTI-371) <sup>9</sup>                                                                                                                                                        |
| Chemokine CXCR1                                   | Reparixin <sup>10</sup> ; SCH527123 <sup>12</sup> (Compound 2-27-these inhibit CXCL8 that<br>activates CXCR1-overall inhibitors of CXCR1) <sup>11</sup> (SCH-479833 with an<br>update on SCH527123) <sup>12,14</sup>                                            |
| Chemokine CXCR2                                   | Reparixin <sup>10</sup> ; SCH527123 <sup>12</sup> ; SB656933 <sup>13</sup> ; DF2162 <sup>13</sup> ; (SCH-479833 with<br>an update on SCH527123) <sup>12,14</sup>                                                                                                |
| Chemokine CXCR3                                   | IP-10, I-TAC                                                                                                                                                                                                                                                    |
| Chemokine CXCR4                                   | RSVM <sup>15</sup> ; ASLW <sup>15</sup> ; trichosanthin <sup>16</sup> ; plerixafor <sup>17</sup>                                                                                                                                                                |
| Chemokine CCR1                                    | BX-471 <sup>18</sup> ; CP-481-715 <sup>19</sup> ; UCB35625 <sup>20</sup>                                                                                                                                                                                        |
| Chemokine CCR3                                    | UCB35625 <sup>20</sup>                                                                                                                                                                                                                                          |
| Chemokine CCR5                                    | Trichosanthin <sup>16</sup> ; TAK779 <sup>21</sup> ; Aplaviroc (also, AK602 and 873140 <sup>21,22</sup> );<br>AK530 <sup>23</sup> ; TAKK 220 <sup>24</sup> ; SCH351125 (also, ancriviroc) <sup>25</sup> ; vicriviroc <sup>26</sup> ;<br>maraviroc <sup>27</sup> |
| Dopamine D <sub>1</sub>                           | Zinc <sup>28</sup>                                                                                                                                                                                                                                              |
| Dopamine D <sub>2</sub>                           | Amiloride <sup>29</sup> , zinc,                                                                                                                                                                                                                                 |
| Endothelin ET <sub>A</sub>                        | aspirin, sodium salicylate <sup>30</sup>                                                                                                                                                                                                                        |
| Gonadotropin-releasing<br>hormone receptor (GnRH) | Furan Derivative -1 (appears to be bitopic) <sup>31</sup> ; TAK-013 <sup>31</sup> ;                                                                                                                                                                             |
| GH secretagogue                                   | L-629,429, GHRP-6, MK-677 <sup>32</sup>                                                                                                                                                                                                                         |
| Luteinizing hormone                               | Org 41841 <sup>33</sup> , [ <sup>3</sup> H]Org 43553 <sup>34</sup>                                                                                                                                                                                              |
| mAChR M1                                          | Brucine; BQCA; TBPB; AC-42; 77-LH-28-1; N-DMC; VU0119498 <sup>35</sup><br>staurosporine; <sup>36</sup> ML071 <sup>37</sup> ML169; ML137;                                                                                                                        |
| mAChR M2                                          | McN-A-343; BR384; gallamine; <sup>38</sup> W84; <sup>39</sup> ; AC-42; 77-LH-28-1 <sup>40</sup>                                                                                                                                                                 |
| mAChR M3                                          | VU0119498 <sup>35</sup>                                                                                                                                                                                                                                         |
| mAChR M4                                          | LY2033298; VU0010010; VU0152099; ML108; Thiochrome; <sup>35</sup> WIN<br>62577; <sup>41</sup> alcuronium; ML173, ML253, ML293                                                                                                                                   |
| mAChR M5                                          | ML129; VU0119498; <sup>35</sup> VU0365114; VU0400265 <sup>42</sup> ; ML172, ML375                                                                                                                                                                               |
| Neurokinin NK <sub>1</sub>                        | Heparin                                                                                                                                                                                                                                                         |
| Opioid μ, δ                                       | Cannabidiol <sup>43</sup>                                                                                                                                                                                                                                       |
| Purine P2 <sub>Y1</sub>                           | 2,2-o-pyridylisatogen tosylate                                                                                                                                                                                                                                  |
| Serotonin 5HT <sub>1B/1D</sub>                    | 5HT-modulin                                                                                                                                                                                                                                                     |
| Serotonin 5HT <sub>2A</sub> , 5HT <sub>2</sub>    | Oleamine <sup>44</sup>                                                                                                                                                                                                                                          |
| Serotonin 5HT <sub>2C</sub>                       | Oleamine; <sup>44</sup> PNU-69176E <sup>45</sup>                                                                                                                                                                                                                |

2-AG, 2-arachidonylglycerol; 5-HT, 5-hydroxytryptophan (serotonin), CCR, chemokine CC-motif receptor; CXCR, chemokine CXCR-motif receptor; GnRH, gonadotropin-releasing hormone; mAChR, muscarinic acetylcholine receptor

## References

- <sup>1</sup>Aurelio, L. *et al.* 3- and 6-Substituted 2-amino-4,5,6,7-tetrahydrothieno[2,3-c]pyridines as A1 adenosine receptor allosteric modulators and antagonists. *Bioorg Med Chem* 17, 7353-61 (2009)
- <sup>2</sup>Valant, C. *et al.* Delineating the mode of action of adenosine A1 receptor allosteric modulators. *Mol Pharmacol* 78, 444-55 (2010).
- <sup>3</sup>Kim, Y., de Castro, S., Gao, Z.G., Ijzerman, A.P. & Jacobson, K.A. Novel 2- and 4-substituted 1H-imidazo[4,5-c]quinolin-4-amine derivatives as allosteric modulators of the A3 adenosine receptor. *J Med Chem* 52, 2098-108 (2009).
- <sup>4</sup>Lane, J.R., Beukers, M.W., Mulder-Krieger, T. & Ijzerman, A.P. The endocannabinoid 2-arachidonylglycerol is a negative allosteric modulator of the human A3 adenosine receptor. *Biochem Pharmacol* 79, 48-56 (2010).
- <sup>5</sup>Pihlavisto, M., Sjöholm, B., Scheinin, M. & Wurster, S. Modulation of agonist binding to recombinant human alpha2-adrenoceptors by sodium ions. *Biochim Biophys Acta* 1448, 135-46 (1998).
- <sup>6</sup>Swaminath, G., Steenhuis, J., Kobilka, B. & Lee, T.W. Allosteric modulation of beta2-adrenergic receptor by Zn(2+). *Mol Pharmacol* 61, 65-72 (2002).
- <sup>7</sup>Price, M.R. *et al.* Allosteric modulation of the cannabinoid CB1 receptor. *Mol Pharmacol* 68, 1484-95 (2005).
- <sup>8</sup>Horswill, J.G. *et al.* PSNCBAM-1, a novel allosteric antagonist at cannabinoid CB1 receptors with hypophagic effects in rats. *Br J Pharmacol* 152, 805-14 (2007).
- <sup>9</sup>Navarro, H.A., Howard, J.L., Pollard, G.T. & Carroll, F.I. Positive allosteric modulation of the human cannabinoid (CB) receptor by RTI-371, a selective inhibitor of the dopamine transporter. *Br J Pharmacol* 156, 1178-84 (2009).
- <sup>10</sup>Marsh, D.R. & Flemming, J.M. Inhibition of CXCR1 and CXCR2 chemokine receptors attenuates acute inflammation, preserves gray matter and diminishes autonomic dysreflexia after spinal cord injury. *Spinal Cord* 49, 337-44 (2011).
- <sup>11</sup>Sablone, M.R. *et al.* Structure-Activity Relationship of novel phenylacetic CXCR1 inhibitors. *Bioorg Med Chem Lett* 19, 4026-30 (2009).
- <sup>12</sup>Varney, M.L. *et al.* Small molecule antagonists for CXCR2 and CXCR1 inhibit human colon cancer liver metastases. *Cancer Lett* 300, 180-8 (2011).
- <sup>13</sup>Chapman, R.W. *et al.* CXCR2 antagonists for the treatment of pulmonary disease. *Pharmacol Ther* 121, 55-68 (2009).
- <sup>14</sup>Singh, S. *et al.* Small-molecule antagonists for CXCR2 and CXCR1 inhibit human melanoma growth by decreasing tumor cell proliferation, survival, and angiogenesis. *Clin Cancer Res* 15, 2380-6 (2009).
- <sup>15</sup>Sachpatzidis, A. *et al.* Identification of allosteric peptide agonists of CXCR4. *J Biol Chem* 278, 896-907 (2003).
- <sup>16</sup>Zhao, J. *et al.* Anti-HIV agent trichosanthin enhances the capabilities of chemokines to stimulate chemotaxis and G protein activation, and this is mediated through interaction of trichosanthin and chemokine receptors. *J Exp Med* 190, 101-11 (1999).
- <sup>17</sup>Cashen, A.F., Nervi, B. & DiPersio, J. AMD3100: CXCR4 antagonist and rapid stem cell-mobilizing agent. *Future Oncol* 3, 19-27 (2007).
- <sup>18</sup>Vaidehi, N. *et al.* Predictions of CCR1 chemokine receptor structure and BX 471 antagonist binding followed by experimental validation. *J Biol Chem* 281, 27613-20 (2006).
- <sup>19</sup>Gladue, R.P. *et al.* The human specific CCR1 antagonist CP-481,715 inhibits cell infiltration and inflammatory responses in human CCR1 transgenic mice. *J Immunol* 176, 3141-8 (2006).
- <sup>20</sup>Sabroe, I. *et al.* A small molecule antagonist of chemokine receptors CCR1 and CCR3. Potent inhibition of eosinophil function and CCR3-mediated HIV-1 entry. *J Biol Chem* 275, 25985-92 (2000).
- <sup>21</sup>Watson, C., Jenkinson, S., Kazmierski, W. & Kenakin, T. The CCR5 receptor-based mechanism of action of 873140, a potent allosteric noncompetitive HIV entry inhibitor. *Mol Pharmacol* 67, 1268-82 (2005).

- <sup>22</sup>Nichols, W.G. *et al.* Hepatotoxicity observed in clinical trials of apilavirac (GW873140). *Antimicrob Agents Chemother* 52, 858-65 (2008).
- <sup>23</sup>Maeda, K. *et al.* Spirodiketopiperazine-based CCR5 inhibitor which preserves CC-chemokine/CCR5 interactions and exerts potent activity against R5 human immunodeficiency virus type 1 *in vitro*. *J Virol* 78, 8654-62 (2004).
- <sup>24</sup>Tremblay, C.L. *et al.* TAK-220, a novel small-molecule CCR5 antagonist, has favorable anti-human immunodeficiency virus interactions with other antiretrovirals *in vitro*. *Antimicrob Agents Chemother* 49, 3483-5 (2005).
- <sup>25</sup>Strizki, J.M. *et al.* SCH-C (SCH 351125), an orally bioavailable, small molecule antagonist of the chemokine receptor CCR5, is a potent inhibitor of HIV-1 infection *in vitro* and *in vivo*. *Proc Natl Acad Sci U S A* 98, 12718-23 (2001).
- <sup>26</sup>Klibanov, O.M. Vicriviroc, a CCR5 receptor antagonist for the potential treatment of HIV infection. *Curr Opin Investig Drugs* 10, 845-59 (2009).
- <sup>27</sup>Meanwell, N.A. & Kadow, J.F. Maraviroc, a chemokine CCR5 receptor antagonist for the treatment of HIV infection and AIDS. *Curr Opin Investig Drugs* 8, 669-81 (2007).
- <sup>28</sup>Schetz, J.A. & Sibley, D.R. Zinc allosterically modulates antagonist binding to cloned D1 and D2 dopamine receptors. *J Neurochem* 68, 1990-7 (1997).
- <sup>29</sup>Hoare, S.R., Coldwell, M.C., Armstrong, D. & Strange, P.G. Regulation of human D(1), d(2(long)), d(2(short)), D(3) and D(4) dopamine receptors by amiloride and amiloride analogues. *Br J Pharmacol* 130, 1045-59 (2000).
- <sup>30</sup>De Mey, J.G., Compeer, M.G., Lemkens, P. & Meens, M.J. ETA-receptor antagonists or allosteric modulators? *Trends Pharmacol Sci* 32, 345-51 (2011).
- <sup>31</sup>Heitman, L.H., Ye, K., Oosterom, J. & Ijzerman, A.P. Amiloride derivatives and a nonpeptidic antagonist bind at two distinct allosteric sites in the human gonadotropin-releasing hormone receptor. *Mol Pharmacol* 73, 1808-15 (2008).
- <sup>32</sup>Holst, B. *et al.* Overlapping binding site for the endogenous agonist, small-molecule agonists, and ago-allosteric modulators on the ghrelin receptor. *Mol Pharmacol* 75, 44-59 (2009).
- <sup>33</sup>Janovick, J.A. *et al.* Increased plasma membrane expression of human follicle-stimulating hormone receptor by a small molecule thienopyr(im)idine. *Mol Cell Endocrinol* 298, 84-8 (2009).
- <sup>34</sup>Heitman, L.H. *et al.* [3H]Org 43553, the first low-molecular-weight agonistic and allosteric radioligand for the human luteinizing hormone receptor. *Mol Pharmacol* 73, 518-24 (2008).
- <sup>35</sup>Conn, P.J., Jones, C.K. & Lindsley, C.W. Subtype-selective allosteric modulators of muscarinic receptors for the treatment of CNS disorders. *Trends Pharmacol Sci* 30, 148-55 (2009).
- <sup>36</sup>Gregory, K.J., Sexton, P.M. & Christopoulos, A. Allosteric modulation of muscarinic acetylcholine receptors. *Curr Neuropharmacol* 5, 157-67 (2007).
- <sup>37</sup>Reid, P.R. *et al.* Discovery and optimization of a novel, selective and brain penetrant M1 positive allosteric modulator (PAM): the development of ML169, an MLPCN probe. *Bioorg Med Chem Lett* 21, 2697-701 (2011).
- <sup>38</sup>Suga, H. & Ehlert, F.J. Investigating the interaction of McN-A-343 with the M2 muscarinic receptor using its nitrogen mustard derivative. *Biochem Pharmacol* 79, 1025-35 (2010).
- <sup>39</sup>Maier-Peuschel, M. *et al.* A fluorescence resonance energy transfer-based M2 muscarinic receptor sensor reveals rapid kinetics of allosteric modulation. *J Biol Chem* 285, 8793-800 (2010).
- <sup>40</sup>May, L.T. *et al.* Structure-function studies of allosteric agonism at M2 muscarinic acetylcholine receptors. *Mol Pharmacol* 72, 463-76 (2007).
- <sup>41</sup>Lanzafame, A.A., Sexton, P.M. & Christopoulos, A. Interaction studies of multiple binding sites on m4 muscarinic acetylcholine receptors. *Mol Pharmacol* 70, 736-46 (2006).
- <sup>42</sup>Bridges, T.M., Kennedy, J.P., Hopkins, C.R., Conn, P.J. & Lindsley, C.W. Heterobiaryl and heterobiaryl ether derived M5 positive allosteric modulators. *Bioorg Med Chem Lett* 20, 5617-22 (2010).
- <sup>43</sup>Kathmann, M., Flau, K., Redmer, A., Trankle, C. & Schlicker, E. Cannabidiol is an allosteric modulator at mu- and delta-opioid receptors. *Naunyn Schmiedebergs Arch Pharmacol* 372, 354-61 (2006).

- <sup>44</sup>Thomas, E.A., Carson, M.J., Neal, M.J. & Sutcliffe, J.G. Unique allosteric regulation of 5-hydroxytryptamine receptor-mediated signal transduction by oleamide. *Proc Natl Acad Sci U S A* 94, 14115-9 (1997).
- <sup>45</sup>Im, W.B., Chio, C.L., Alberts, G.L. & Dinh, D.M. Positive allosteric modulator of the human 5-HT<sub>2C</sub> receptor. *Mol Pharmacol* 64, 78-84 (2003).
